# Supplementary material for: Hematite homojunctions without foreign element doping for efficient and stable overall water splitting
Source: Royal Society of Chemistry journal article supplement (doi:10.1039/c6ra13060g), 2016-01-01
Supplement: c6ra13060g1.pdf [file c6ra13060g1.pdf]

## Supporting Information

# Hematite Homojunctions without Foreign Element Doping for Efficient and Stable Overall Water Splitting

Qing Yu,<sup>[a][b]</sup> Xianguang Meng,<sup>[b]</sup> Li Shi,<sup>[a][b]</sup> Guigao Liu,<sup>[a][b]</sup> Peng Li,<sup>[b]</sup> and Jinhua Ye\*<sup>[a][b][c][d]</sup>

*[a] Graduate School of Chemical Science and Engineering, Hokkaido University, Sapporo, 060-0814, Japan*

*[b] International Center for Materials Nanoarchitectonics (WPI-MANA), and Environmental Remediation Materials Unit, National Institute for Materials Science (NIMS), 1-1 Namiki, Tsukuba, Ibaraki, 305-0044, Japan*

*[c] TU-NIMS Joint Research Center, School of Material Science and Engineering, Tianjin University, 92 Weijin Road, Tianjin, P.R. China*

*[d] Collaborative Innovation Center of Chemical Science and Engineering (Tianjin), Tianjin 300072, People's Republic of China*

\* Corresponding author, TEL: +81-29-859-2646, E-mail: Jinhua.YE@nims.go.jp

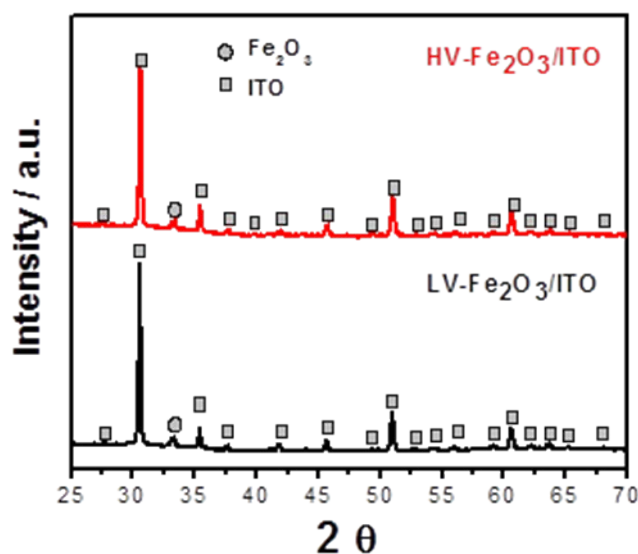

**Figure S1.** XRD patterns for bare HV-Fe<sub>2</sub>O<sub>3</sub> and bare LV-Fe<sub>2</sub>O<sub>3</sub> respectively.

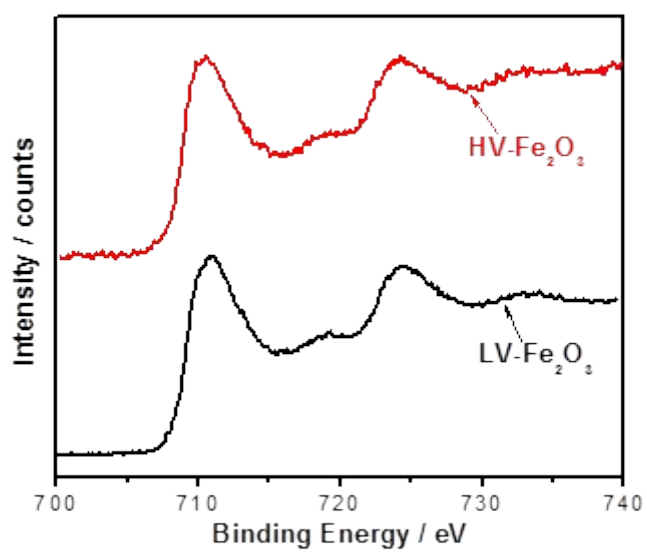

**Figure S2.** XPS spectra of Fe (2p) for bare HV-Fe<sub>2</sub>O<sub>3</sub> and bare LV-Fe<sub>2</sub>O<sub>3</sub> respectively.

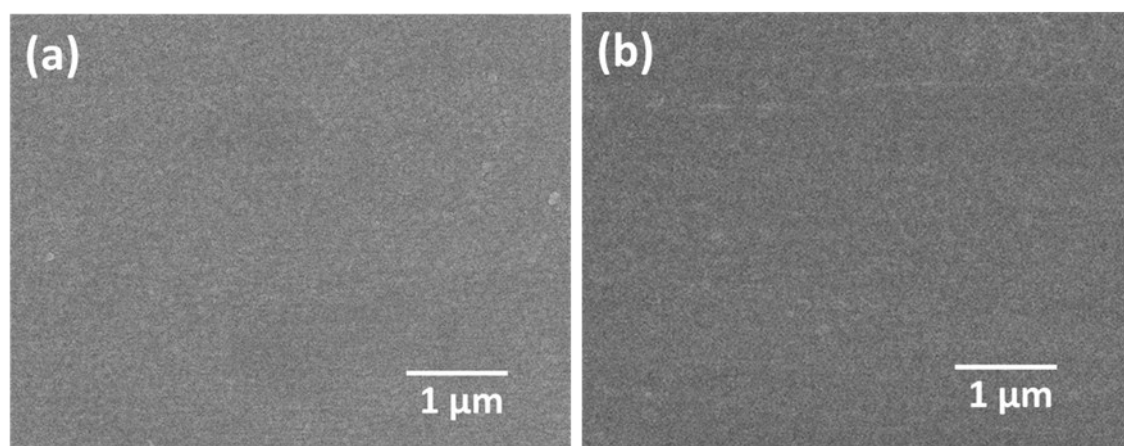

**Figure S3.** SEM for the surface view of HV-Fe<sub>2</sub>O<sub>3</sub> (a) and LV-Fe<sub>2</sub>O<sub>3</sub> (b) irradiated by the laser for 20 minutes.

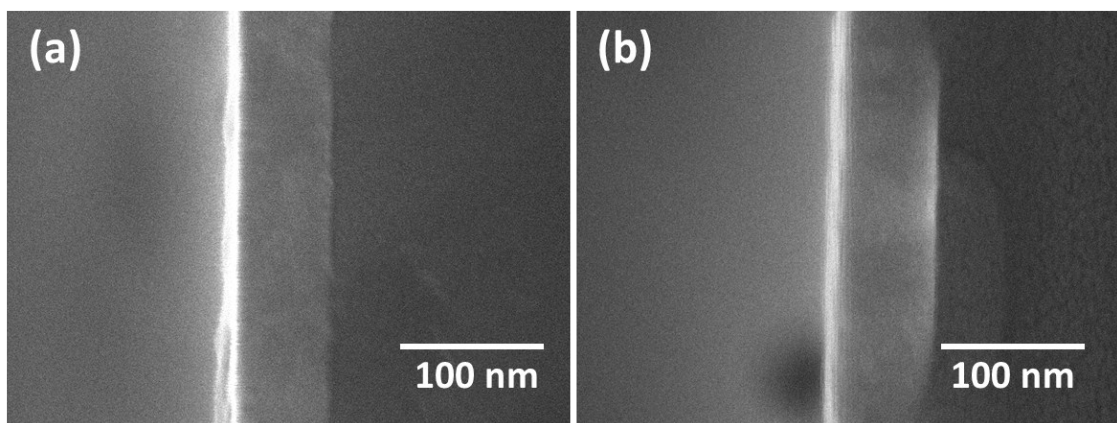

**Figure S4.** SEM for the cross view of HV-Fe<sub>2</sub>O<sub>3</sub> (a) and LV-Fe<sub>2</sub>O<sub>3</sub> (b) irradiated by the laser for 20 minutes. The thicknesses of them are about 70 nm.

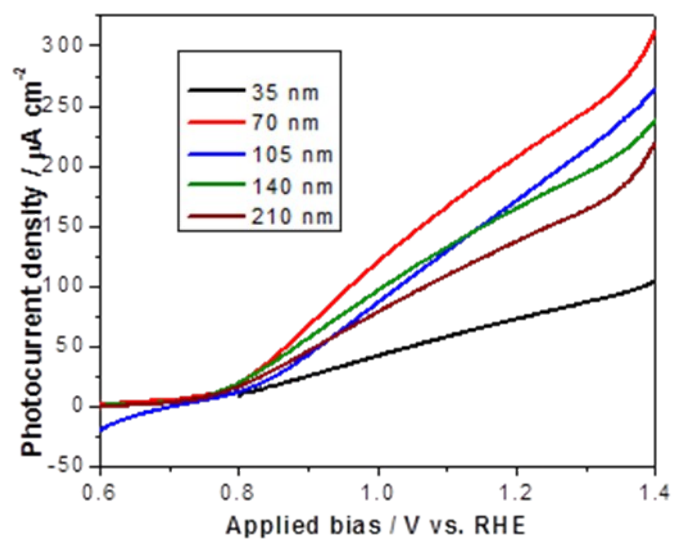

**Figure S5.** LSV curves for HV-Fe<sub>2</sub>O<sub>3</sub> films with different thicknesses.

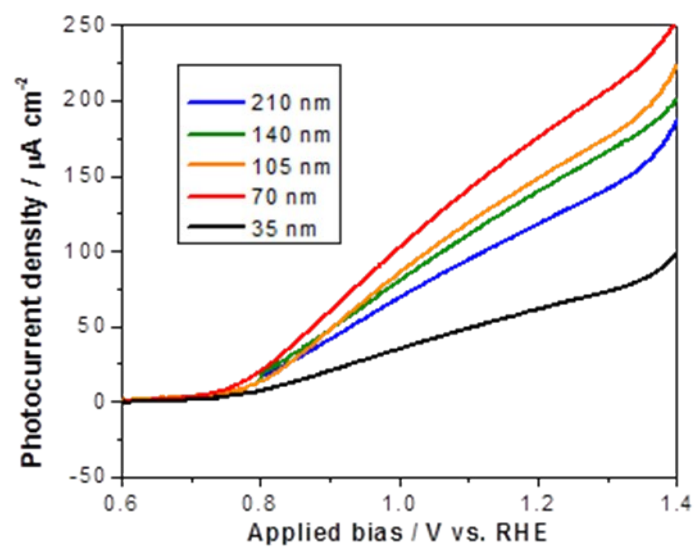

**Figure S6.** LSV curves for LV-Fe<sub>2</sub>O<sub>3</sub> films with different thicknesses.

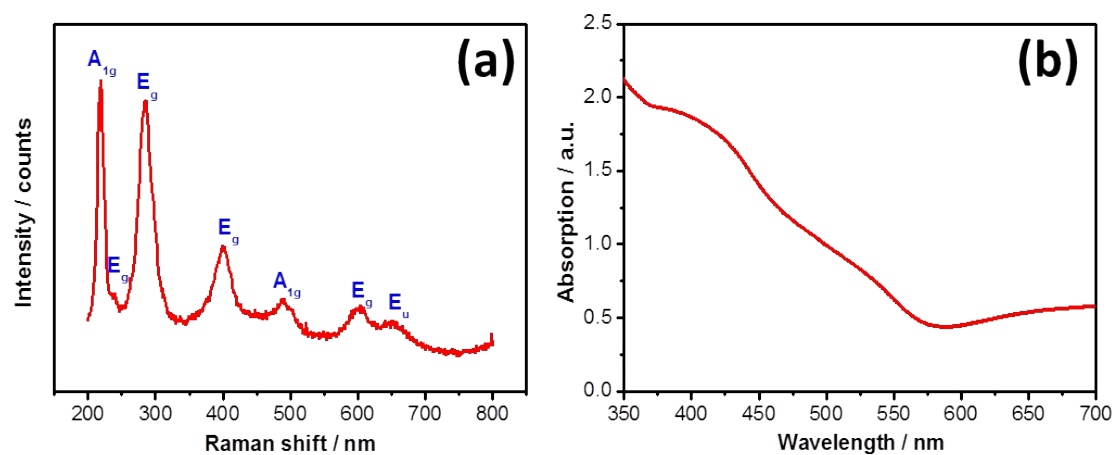

**Figure S7.** Raman shift (a) and UV-vis absorption spectra (b) of 140 nm HV/LV-Fe<sub>2</sub>O<sub>3</sub> homojunction.

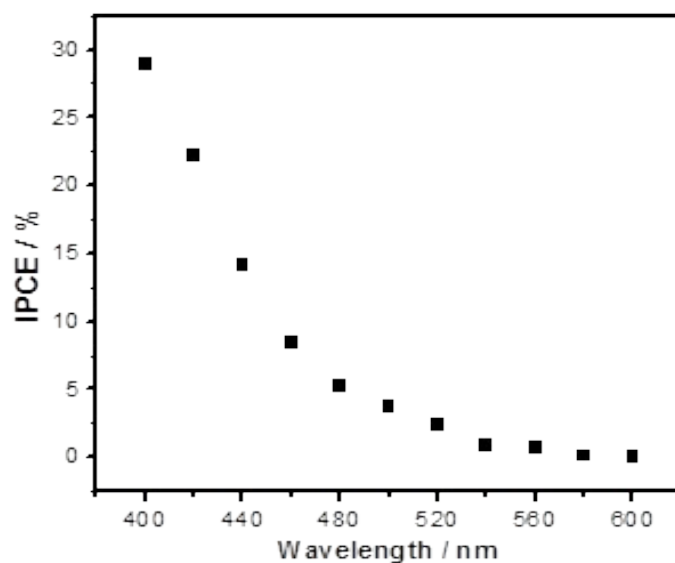

**Figure S8.** Incident photo-to-current conversion efficiency (IPCE) of the HV/LV-Fe<sub>2</sub>O<sub>3</sub> homojunction.

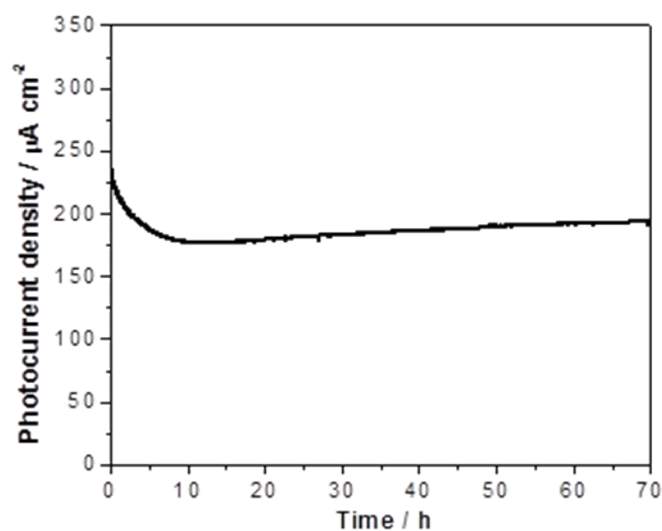

**Figure S9.** Long-time I-T curves of single HV-Fe<sub>2</sub>O<sub>3</sub>.

In the case of homojunction, the photocurrent density decreased only 7.8% after 73 hours. However, in the case of HV-Fe<sub>2</sub>O<sub>3</sub>, after only 10 hours, the photocurrent density has decreased 15.0%. This proved that the oxygen vacancies in HV-Fe<sub>2</sub>O<sub>3</sub> had been stabilized and protected by the outside HV-Fe<sub>2</sub>O<sub>3</sub> layer.

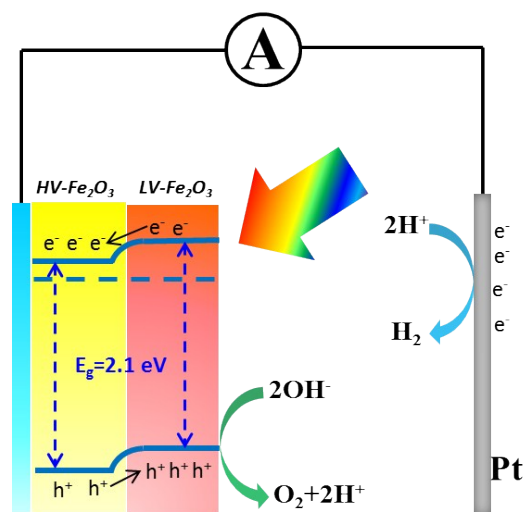

**Figure S10.** Schematic diagram for the solar water splitting process of hematite homojunction photoanodes.
